# Supplementary material for: Genome-wide mutagenesis and multi-drug resistance in American trypanosomes induced by the front-line drug benznidazole
Source: PubMed Central journal article supplement (PMC5663738; doi:10.1038/s41598-017-14986-6), 2017-10-31
Supplement: 41598_2017_14986_MOESM1_ESM.pdf [file 41598_2017_14986_MOESM1_ESM.pdf]

# **Genome-wide mutagenesis and multi-drug resistance in American trypanosomes induced by the front-line drug benznidazole**

Mônica C. Campos,<sup>1</sup> Jody Phelan,<sup>1</sup> Amanda F. Francisco,<sup>1</sup> Martin C. Taylor,<sup>1</sup> Michael D. Lewis,<sup>1</sup> Arnab Pain,<sup>2</sup> Taane G. Clark<sup>1,3</sup> and John M. Kelly<sup>1\*</sup>

Supplementary data: Tables S1 and S2; Figures S1 and S2

**Supplementary Figure 1.** Mutations associated with ergosterol biosynthesis in drug-resistant *Trypanosoma cruzi* clones. (a) An overview of the biosynthetic pathway highlighting genes that have acquired mutations (red), and identifying the reaction catalysed by lanosterol 14 $\alpha$ -demethylase (CYP51). (b) Missense mutations in genes involved in *T. cruzi* ergosterol biosynthesis. (c) Mutations in the region immediately upstream of the *CYP51* gene.

**Supplementary Figure 2.** Analysis of intra-parasite posaconazole-CYP51 interaction using flow cytometry. *T. cruzi* epimastigotes ( $1 \times 10^6$ ) (parental Y strain and the three benznidazole-resistant clones) were incubated for 5 minutes with 2  $\mu$ M posaconazole conjugated with the fluorophore boron-dipyrromethene (POS-BODIPY). Binding of POS-BODIPY to CYP51 disrupts the stacking interaction between the fluorophore moiety and the aromatic rings of the drug, rendering the compound highly fluorescent. For the assay, 10,000 events were analyzed and the epimastigotes selectively gated. Data are expressed as the mean of BODIPY fluorescence (emission  $\lambda = 506$ nm) in each parasite set: parental Y strain not treated (grey), and parental (blue), clone 1 (red), clone 2 (orange) and clone 3 (green) parasites treated with POS-BODIPY. The WinMDI software package was used for data analysis. There were no significant differences between parental parasites and the drug-resistant clones and no association with the extent of posaconazole resistance.

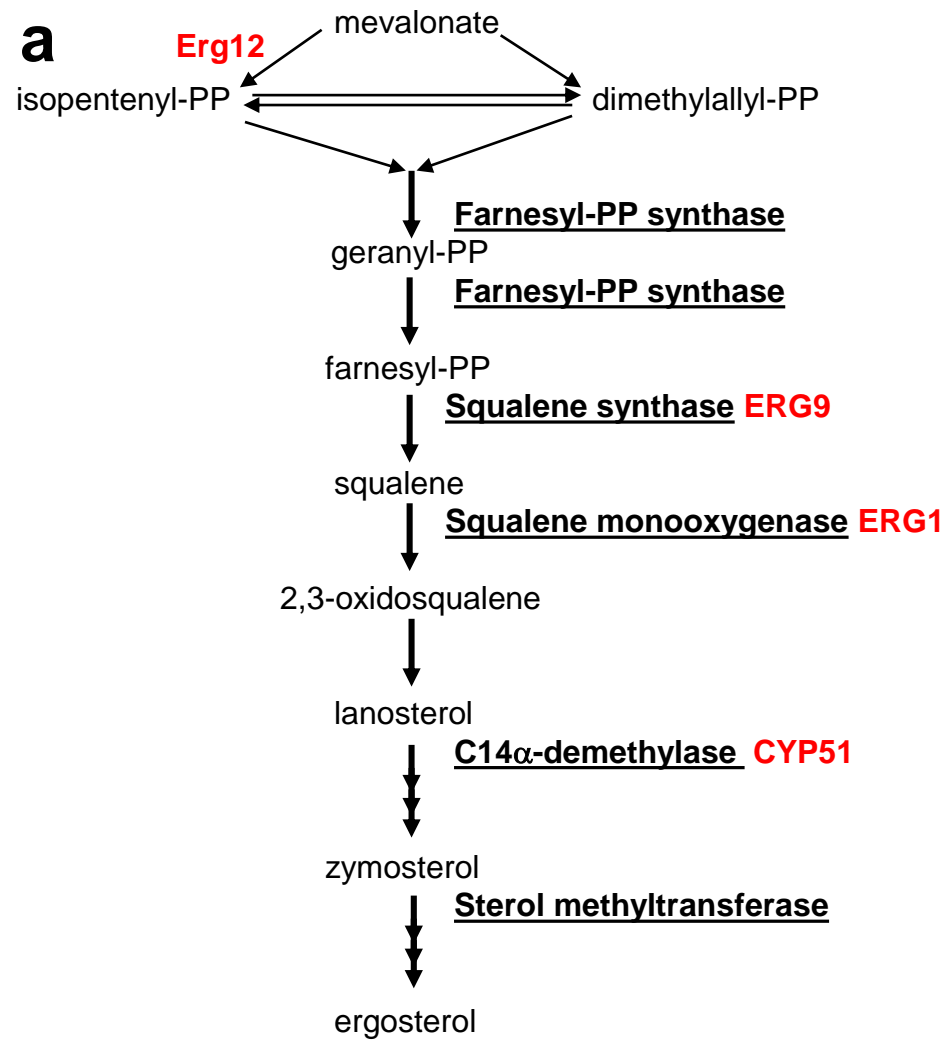

**b**

| Gene name                      | Chromosome | Position | Nucleotide changes (missense) |         |         |
|--------------------------------|------------|----------|-------------------------------|---------|---------|
|                                |            |          | Clone 1                       | Clone 2 | Clone 3 |
| Erg 12 (mevalonate kinase)     | TCRUZ_31   | 391046   |                               | G->T    | G->T    |
| Erg 1 (squalene monooxygenase) | TCRUZ_14   | 414731   | T->G                          | T->G    | T->G    |
| Erg 9 (squalene synthase)      | TCRUZ_31   | 66182    | A->C                          | A->C    | A->C    |

**c**

| Gene Name | Chromosome | Position | Nucleotide changes (upstream gene variant) |         |         |
|-----------|------------|----------|--------------------------------------------|---------|---------|
|           |            |          | Clone 1                                    | Clone 2 | Clone 3 |
| CYP51     | TCRUZ_27   | 70702    | C -> T                                     |         | C -> T  |
| CYP51     | TCRUZ_27   | 71525    | C -> T                                     |         |         |
| CYP51     | TCRUZ_27   | 71532    |                                            | G -> T  | G -> T  |
| CYP51     | TCRUZ_27   | 71563    |                                            | C -> T  |         |
| CYP51     | TCRUZ_27   | 71565    |                                            | C -> T  |         |

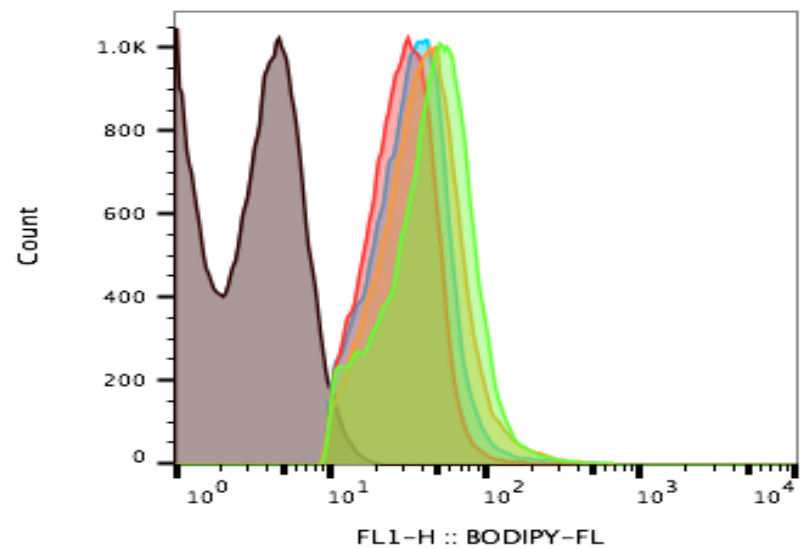

| Cell line              | fluorescence |
|------------------------|--------------|
| Parental – not treated | 2.4          |
| Parental – treated     | 40.2         |
| Clone 1                | 34.0         |
| Clone 2                | 47.9         |
| Clone 3                | 53.9         |

**Supplementary Table 1. Nonsense and nonstop mutations detected in *T. cruzi* clones selected for benznidazole-resistance**

**Gain of stop codon**

| Gene Name                                                           | Chromosome | Position | Nucleotide changes |         |         |
|---------------------------------------------------------------------|------------|----------|--------------------|---------|---------|
|                                                                     |            |          | Clone 1            | Clone 2 | Clone 3 |
| Concanavalin A-like lectin/glucanases superfamily                   | TCRUZ_00   | 1087576  |                    | C → G   |         |
| BNR repeat-like domain containing protein                           | TCRUZ_2    | 87197    |                    | G → T   |         |
| Elongation factor 1 gamma                                           | TCRUZ_14   | 158587   | G → A              | G → A   | G → A   |
| NADH-cytochrome b5 reductase                                        | TCRUZ_14   | 260955   | C → T              | C → T   | C → T   |
| Hypothetical protein                                                | TCRUZ_18   | 122195   | G → T              | G → T   | G → T   |
| Hypothetical protein                                                | TCRUZ_28   | 2033     | A → G              |         | A → G   |
| Nitroreductase                                                      | TCRUZ_28   | 53287    | C → T              | C → T   | C → T   |
| Aminopeptidase                                                      | TCRUZ_31   | 195692   |                    | C → A   |         |
| Adenylate and Guanylate cyclase catalytic domain containing protein | TCRUZ_35   | 453172   |                    | G → A   |         |
| Hypothetical protein                                                | TCRUZ_36   | 189116   |                    |         | G → T   |
| Glucose-6-phosphate dehydrogenase                                   | TCRUZ_36   | 1026428  | C → G              |         |         |
| Hypothetical protein                                                | TCRUZ_39   | 1447230  |                    |         | G → A   |
| Hypothetical protein                                                | TCRUZ_40   | 532683   | C → T              |         |         |
| Phospholipid:diacylglycerol acyltransferase, putative               | TCRUZ_41   | 383509   | A → T              | A → T   | A → T   |

**Loss of stop codon**

|                                                                    |          |         |       |       |       |
|--------------------------------------------------------------------|----------|---------|-------|-------|-------|
| Hypothetical protein                                               | TCRUZ_00 | 176037  | T → G |       | T → G |
| Hypothetical protein                                               | TCRUZ_00 | 1181457 |       | A → C |       |
| Retrotransposon hot spot protein                                   | TCRUZ_14 | 80072   |       | G → T | G → T |
| Flagellar radial spoke component                                   | TCRUZ_14 | 87763   | T → A |       | T → A |
| Neutral sphingomyelinase activation associated factor-like protein | TCRUZ_22 | 403964  | A → C | A → C | A → C |
| Fucose kinase                                                      | TCRUZ_25 | 305903  | T → G | T → G | T → G |
| Hypothetical protein                                               | TCRUZ_26 | 462012  |       | G → C |       |
| Hypothetical protein                                               | TCRUZ_29 | 98582   | A → G | A → G | A → G |
| CRAL/TRIO domain containing protein                                | TCRUZ_31 | 115283  | A → G |       |       |
| 5-oxoprolinase                                                     | TCRUZ_40 | 741377  | G → T |       |       |
| Hypothetical protein                                               | TCRUZ_41 | 206855  |       | A → C |       |

| <b>EC<sub>50</sub> (6 days)</b> |                 |                 |                 |                     |                 |
|---------------------------------|-----------------|-----------------|-----------------|---------------------|-----------------|
|                                 | <b>BNZ (μM)</b> | <b>NIF (μM)</b> | <b>FEX (μM)</b> | <b>FEX-SUL (μM)</b> | <b>POS (nM)</b> |
| <b>Parental</b>                 | 5.1 ± 0.3       | 3.3 ± 0.4       | 4.0 ± 1.2       | 5.2 ± 0.4           | 3.5 ± 0.5       |
| <b>Clone 1</b>                  | 44.5 ± 2.8      | 12.6 ± 0.6      | 21.8 ± 1.5      | 17.6 ± 1.8          | 55.9 ± 6.5      |
| <b>Clone 2</b>                  | 133.7 ± 5.5     | 8.9 ± 0.2       | 16.3 ± 0.7      | 9.3 ± 0.3           | 21.7 ± 2.4      |
| <b>Clone 3</b>                  | 75.6 ± 4.1      | 8.0 ± 0.5       | 11.2 ± 1.8      | 9.7 ± 1.1           | 78.3 ± 7.1      |

**Supplementary Table 2. Efficacy of nitroheterocyclic compounds and posaconazole against benznidazole-resistant *T. cruzi* clones.**

*T. cruzi* epimastigotes (parental and drug-resistant clones) were seeded in 96-well plates in the presence of a range of concentrations of benznidazole (BNZ), nifurtimox (NF), fexinidazole (FEX), fexinidazole sulfone (FEX-SUL), or posaconazole (POS) and incubated for 4 days at 28°C, with resazurin added for the final 48 hours (Methods). Statistical analysis was performed using one-way analysis of variance, with significance for *p* values <0.05 (\*).
